# Supplementary material for: Encapsulating aluminum nanoparticles into carbon nanotubes for combustion: a molecular dynamics study
Source: Royal Society of Chemistry journal article supplement (doi:10.1039/d1cp01135a), 2021-01-01
Supplement: d1cp01135a1.pdf [file d1cp01135a1.pdf]

## Supplementary Information

### Encapsulated aluminum nanoparticles into carbon nanotubes for combustion: A molecular dynamics study

Liang Song,<sup>a</sup> Feng-Qi Zhao,<sup>b</sup> Si-Yu Xu<sup>b</sup> and Xue-Hai Ju<sup>\*a</sup>

<sup>a</sup> Key Laboratory of Soft Chemistry and Functional Materials of MOE, School of Chemical Engineering, Nanjing University of Science and Technology, Nanjing 210094, P. R. China

<sup>b</sup> Science and Technology on Combustion and Explosion Laboratory, Xi'an Modern Chemistry Research Institute, Xi'an 710065, P. R. China

In order to verify the adequacy of the ReaxFF potential for the title composite, the bond parameters of the interaction between CNTs and ANPs were calculated and shown in Fig. S1 and Table S1. The bond parameters were calculated using ReaxFF and DFT method (GGA/PBE functional in Dmol<sup>3</sup> module). As can be seen from Table S1, the bond parameters optimized by ReaxFF force fields are excellently consistent with those by DFT method.

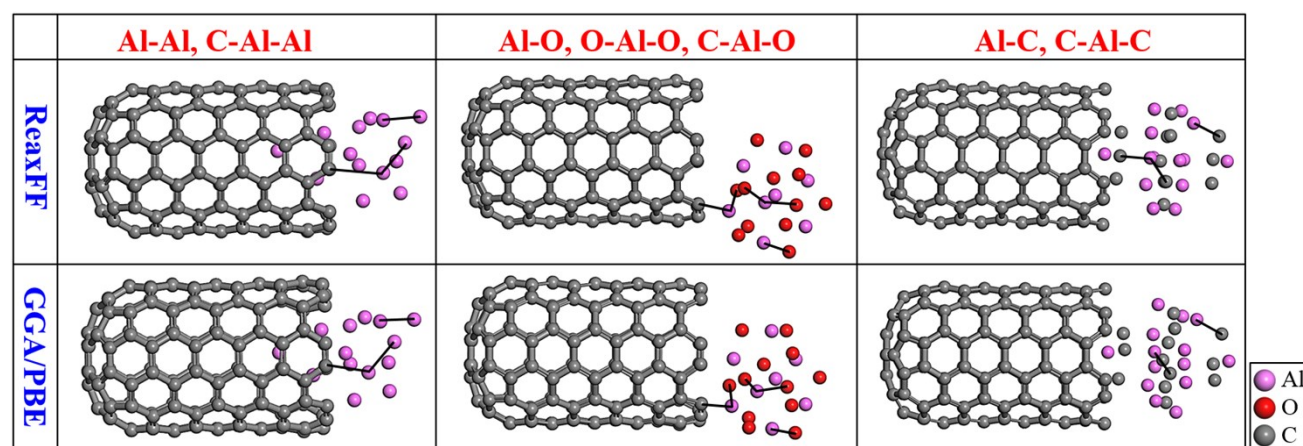

Fig. S1 The optimized structure of CNTs/ANPs composites by ReaxFF and DFT methods. The black line represents the sampled bond length and bond angle.

Table S1 Bond parameters of Al-X (X=C/O) interactions. The bond lengths ( $L$ , Å), bond angles ( $A$ , °), bond/angle energies ( $E$ , kcal/mol), and relative error ( $Er$ , %) of the Al-X (X=C/O) interactions for CNTs/ANPs composite.

| Bond | No. | Bond type | $L_{\text{ReaxFF}}$ | $L_{\text{GGA/PBE}}$ | $Er$ (%) | $E_{\text{ReaxFF}}$ | $E_{\text{GGA/PBE}}$ | $Er$ (%) |
|------|-----|-----------|---------------------|----------------------|----------|---------------------|----------------------|----------|
|------|-----|-----------|---------------------|----------------------|----------|---------------------|----------------------|----------|

|               |     |               |                     |                      |          |                     |                      |          |
|---------------|-----|---------------|---------------------|----------------------|----------|---------------------|----------------------|----------|
|               | 1   | Al-C          | 1.87                | 1.91                 | 2.09     | 109.11              | 112.53               | 3.04     |
|               | 2   | Al-O          | 1.81                | 1.77                 | -2.26    | 171.12              | 169.97               | -0.68    |
|               | 3   | Al-Al         | 2.64                | 2.74                 | 3.65     | 75.58               | 79.68                | 5.15     |
|               | No. | Angle<br>type | $A_{\text{ReaxFF}}$ | $A_{\text{GGA/PBE}}$ | $Er$ (%) | $E_{\text{ReaxFF}}$ | $E_{\text{GGA/PBE}}$ | $Er$ (%) |
| Bond<br>angle | 1   | C-Al-Al       | 120.79              | 124.35               | 2.86     | 15.92               | 15.36                | -3.65    |
|               | 2   | C-Al-C        | 119.32              | 117.40               | -1.64    | 27.39               | 25.94                | -5.59    |
|               | 3   | C-Al-O        | 114.48              | 115.84               | 1.17     | 36.98               | 36.67                | -0.85    |
|               | 4   | O-Al-O        | 115.18              | 117.63               | 2.08     | 38.89               | 39.01                | 0.31     |
